# Supplementary material
Source: PubMed Central journal article supplement (PMC5832928)
Supplement: 10.1194_M082354_jlr.M082354-2.pdf [file 10.1194_M082354_jlr.M082354-2.pdf]

**Supplemental Table S1.** Spectral count data of pacCer-modified proteins in cytosol fractions from mouse melanoma GM95 cells. Displayed are data from two independent experiments showing spectral counts for samples incubated with pacCer or pacGlcCer and then subjected to UV-irradiation (+UV), as indicated. Note that Exp. #1 included an additional control, in which pacLipids were omitted. The following criteria were applied to select for pacCer-modified proteins: (i) no spectral counts in the controls (no pacLipid/ $\pm$ UV, pacCer/-UV) and  $\geq 3$  spectral counts in the pacCer photoaffinity-labeled samples (pacCer/+UV) for Exp. #1 or #2; (ii) a 5-fold enrichment in spectral counts for pacCer photoaffinity-labeled samples (pacCer/+UV) in comparison with the controls for Exp. #1 or #2; (iii) a spectral count ratio for pacCer/+UV over pacGlcCer/+UV samples of  $\geq 1$  for Exp. #1 or #2. High-confidence ceramide binding proteins were selected based on a spectral count ratio for pacCer/+UV over pacGlcCer/+UV samples of  $\geq 2$  for both Exp. #1 and #2 (marked in red).

| Exp. #1 | Exp. #2 | IPI Number              | Protein                                                                 | MW (kDa)   | Experiment #1 |          |          |           |           |          | Experiment #2 |          |           |          |
|---------|---------|-------------------------|-------------------------------------------------------------------------|------------|---------------|----------|----------|-----------|-----------|----------|---------------|----------|-----------|----------|
|         |         |                         |                                                                         |            | no addition   |          | pacCer   |           | pacGlcCer |          | pacCer        |          | pacGlcCer |          |
|         |         |                         |                                                                         |            | -UV           | +UV      | -UV      | +UV       | -UV       | +UV      | -UV           | +UV      | -UV       | +UV      |
| 150     | 291     | IPI00322150             | Thimet oligopeptidase                                                   | 78         | 0             | 0        | 0        | 16        | 5         | 8        | 2             | 5        | 4         | 0        |
| 84      |         | IPI00310240             | Annexin A6                                                              | 75         | 0             | 0        | 0        | 24        | 8         | 17       |               |          |           |          |
| 248     | 318     | <b>IPI00230084</b>      | <b>Aldehyde dehydrogenase family 7, member A1</b>                       | <b>59</b>  | <b>0</b>      | <b>0</b> | <b>0</b> | <b>14</b> | <b>0</b>  | <b>0</b> | <b>1</b>      | <b>9</b> | <b>2</b>  | <b>1</b> |
| 93      | 251     | IPI00122815 (+1)        | Prolyl 4-hydroxylase, beta                                              | 57         | 3             | 1        | 0        | 19        | 8         | 16       | 2             | 5        | 4         | 3        |
| 169     |         | IPI00123604 (+2)        | 40S ribosomal protein SA                                                | 33         | 1             | 1        | 0        | 14        | 7         | 11       |               |          |           |          |
| 116     | 127     | IPI00223415             | Asparaginyl-tRNA synthetase                                             | 64         | 1             | 0        | 3        | 19        | 7         | 12       | 3             | 4        | 6         | 3        |
| 228     |         | IPI00678265             | ADP-ribosylation factor interacting protein 1                           | 38         | 0             | 0        | 0        | 12        | 0         | 7        |               |          |           |          |
| 97      | 125     | IPI00467004             | Signal transducer and activator of transcription 1                      | 88         | 0             | 0        | 0        | 24        | 10        | 18       | 2             | 6        | 4         | 8        |
| 115     | 148     | IPI00126248 (+1)        | ATP citrate lyase                                                       | 121        | 0             | 0        | 0        | 14        | 3         | 17       | 1             | 9        | 4         | 6        |
| 436     | 596     | <b>IPI00310658</b>      | <b>Aldo-keto reductase family 1 member C13</b>                          | <b>37</b>  | <b>0</b>      | <b>0</b> | <b>0</b> | <b>7</b>  | <b>0</b>  | <b>1</b> | <b>0</b>      | <b>4</b> | <b>1</b>  | <b>0</b> |
| 156     | 401     | IPI00380436             | Alpha-actinin-1                                                         | 103        | 0             | 0        | 0        | 11        | 3         | 15       | 0             | 4        | 2         | 1        |
| 29      | 63      | IPI00118899             | Alpha-actinin-4                                                         | 105        | 7             | 5        | 3        | 63        | 29        | 53       | 4             | 13       | 8         | 10       |
| 203     |         | IPI00608097             | Aminopeptidase puromycin sensitive                                      | 103        | 0             | 0        | 0        | 16        | 0         | 5        |               |          |           |          |
| 378     | 559     | <b>IPI00314510</b>      | <b>Aspartoacylase-2</b>                                                 | <b>35</b>  | <b>0</b>      | <b>0</b> | <b>0</b> | <b>5</b>  | <b>0</b>  | <b>1</b> | <b>0</b>      | <b>4</b> | <b>0</b>  | <b>0</b> |
| 267     | 426     | <b>IPI00131870</b>      | <b>COP9 signalosome complex subunit 3</b>                               | <b>48</b>  | <b>0</b>      | <b>0</b> | <b>0</b> | <b>8</b>  | <b>3</b>  | <b>2</b> | <b>0</b>      | <b>3</b> | <b>1</b>  | <b>1</b> |
| 118     | 100     | IPI00323820             | Minichromosome maintenance deficient mitotin                            | 103        | 0             | 0        | 0        | 22        | 4         | 16       | 11            | 7        | 12        | 6        |
| 453     | 610     | <b>IPI00111959</b>      | <b>CTP synthase 1</b>                                                   | <b>67</b>  | <b>0</b>      | <b>0</b> | <b>0</b> | <b>5</b>  | <b>0</b>  | <b>2</b> | <b>0</b>      | <b>3</b> | <b>1</b>  | <b>0</b> |
| 210     | 183     | IPI00315879             | Cytosolic non-specific dipeptidase                                      | 53         | 0             | 0        | 0        | 12        | 0         | 3        | 6             | 5        | 5         | 2        |
| 186     | 655     | <b>IPI00316740</b>      | <b>DNA damage-binding protein 1</b>                                     | <b>127</b> | <b>0</b>      | <b>0</b> | <b>0</b> | <b>16</b> | <b>0</b>  | <b>8</b> | <b>0</b>      | <b>3</b> | <b>1</b>  | <b>0</b> |
| 108     | 156     | IPI00108338             | DNA replication licensing factor MCM3                                   | 92         | 0             | 0        | 0        | 17        | 2         | 17       | 3             | 7        | 5         | 3        |
| 107     | 138     | IPI00117016             | DNA replication licensing factor MCM4                                   | 97         | 0             | 0        | 0        | 23        | 4         | 3        | 3             | 5        | 5         | 4        |
| 290     | 569     | <b>IPI00331385</b>      | <b>DnaJ homolog subfamily C member 7</b>                                | <b>56</b>  | <b>0</b>      | <b>0</b> | <b>0</b> | <b>10</b> | <b>0</b>  | <b>3</b> | <b>0</b>      | <b>2</b> | <b>2</b>  | <b>0</b> |
| 110     | 159     | IPI00462445             | E3 ubiquitin-protein ligase NEDD4                                       | 103        | 0             | 0        | 0        | 20        | 7         | 13       | 4             | 7        | 7         | 5        |
| 48      | 91      | IPI00118676             | Eukaryotic initiation factor 4A-I                                       | 46         | 2             | 1        | 2        | 32        | 9         | 36       | 4             | 9        | 10        | 6        |
| 185     |         | IPI00515654             | Eukaryotic translation elongation factor 1 delta isoform b              | 31         | 0             | 0        | 0        | 22        | 2         | 6        |               |          |           |          |
| 260     |         | IPI00116741             | Exportin-T                                                              | 110        | 0             | 0        | 0        | 10        | 0         | 3        |               |          |           |          |
| 33      | 44      | IPI00555023             | Glutathione S-transferase P 1                                           | 24         | 7             | 4        | 4        | 60        | 23        | 72       | 4             | 5        | 6         | 6        |
| 55      | 40      | IPI00112555             | Glycyl-tRNA synthetase                                                  | 82         | 2             | 1        | 3        | 30        | 9         | 13       | 4             | 15       | 11        | 7        |
| 75      | 126     | IPI00331556             | Heat shock 70 kDa protein 4                                             | 94         | 1             | 1        | 2        | 19        | 15        | 24       | 3             | 8        | 5         | 8        |
| 287     | 595     | <b>IPI00331707</b>      | <b>Hydroxymethylglutaryl-CoA synthase, cytoplasmic</b>                  | <b>58</b>  | <b>0</b>      | <b>0</b> | <b>0</b> | <b>12</b> | <b>2</b>  | <b>4</b> | <b>0</b>      | <b>2</b> | <b>1</b>  | <b>0</b> |
| 149     | 215     | <b>IPI00128880</b>      | <b>Importin-4</b>                                                       | <b>119</b> | <b>0</b>      | <b>1</b> | <b>0</b> | <b>18</b> | <b>1</b>  | <b>8</b> | <b>1</b>      | <b>6</b> | <b>3</b>  | <b>3</b> |
| 142     | 134     | IPI00331444             | Importin-7                                                              | 119        | 0             | 0        | 0        | 17        | 3         | 17       | 3             | 5        | 6         | 7        |
| 229     |         | IPI00119784 (+1)        | Insulin-degrading enzyme                                                | 118        | 0             | 0        | 0        | 12        | 0         | 6        |               |          |           |          |
| 138     | 193     | IPI00124444             | Isoform 1 of 6-phosphofructokinase type C                               | 85         | 0             | 0        | 0        | 11        | 3         | 10       | 2             | 9        | 5         | 3        |
| 517     | 381     | <b>IPI00111167 (+1)</b> | <b>Ceramide transfer protein CERT</b>                                   | <b>71</b>  | <b>0</b>      | <b>0</b> | <b>0</b> | <b>5</b>  | <b>0</b>  | <b>2</b> | <b>0</b>      | <b>3</b> | <b>0</b>  | <b>1</b> |
| 180     |         | IPI00153832 (+1)        | Isoform 1 of endophilin-B2                                              | 44         | 0             | 0        | 0        | 14        | 0         | 9        |               |          |           |          |
| 417     | 729     | <b>IPI00223861</b>      | <b>Isoform 1 of peroxisomal N(1)-acetyl-spermine/spermidine oxidase</b> | <b>55</b>  | <b>0</b>      | <b>0</b> | <b>0</b> | <b>6</b>  | <b>0</b>  | <b>1</b> | <b>0</b>      | <b>3</b> | <b>0</b>  | <b>0</b> |
| 86      | 124     | IPI00122565 (+1)        | Isoform 1 of rab GDP dissociation inhibitor beta                        | 51         | 2             | 1        | 0        | 15        | 5         | 18       | 3             | 4        | 6         | 6        |
| 440     | 425     | IPI00153642 (+1)        | Isoform 1 of ubiquilin-1                                                | 62         | 0             | 0        | 0        | 4         | 0         | 2        | 0             | 3        | 0         | 3        |
| 369     | 529     | <b>IPI00134334 (+1)</b> | <b>Prostaglandin reductase 2</b>                                        | <b>38</b>  | <b>0</b>      | <b>0</b> | <b>0</b> | <b>9</b>  | <b>1</b>  | <b>2</b> | <b>0</b>      | <b>4</b> | <b>1</b>  | <b>1</b> |

Supplemental Table S1. (continued)

| Exp. #1 | Exp. #2 | IPI Number              | Protein                                                                   | MW (kDa)  | Experiment #1 |          |          |           |           |          | Experiment #2 |           |           |          |
|---------|---------|-------------------------|---------------------------------------------------------------------------|-----------|---------------|----------|----------|-----------|-----------|----------|---------------|-----------|-----------|----------|
|         |         |                         |                                                                           |           | no addition   |          | pacCer   |           | pacGlcCer |          | pacCer        |           | pacGlcCer |          |
|         |         |                         |                                                                           |           | -UV           | +UV      | -UV      | +UV       | -UV       | +UV      | -UV           | +UV       | -UV       | +UV      |
| 99      | 69      | IPI00230044             | Isoform 2 of tropomyosin alpha-3 chain                                    | 29        | 1             | 0        | 0        | 14        | 2         | 12       | 9             | 15        | 12        | 10       |
| 238     |         | IPI00556781 (+1)        | Isoform 3 of dynamin-1-like protein                                       | 78        | 0             | 0        | 0        | 10        | 1         | 10       |               |           |           |          |
| 111     | 171     | IPI00123802 (+2)        | Isoform HSP105-alpha of heat shock protein 105 kDa                        | 96        | 1             | 1        | 0        | 15        | 4         | 21       | 3             | 6         | 6         | 4        |
| 177     | 194     | IPI00230682             | Isoform long of 14-3-3 protein beta/alpha                                 | 28        | 1             | 0        | 0        | 12        | 4         | 8        | 0             | 10        | 5         | 2        |
| 201     | 297     | <b>IPI00321734</b>      | <b>Lactoylglutathione lyase</b>                                           | <b>21</b> | <b>0</b>      | <b>0</b> | <b>0</b> | <b>12</b> | <b>0</b>  | <b>2</b> | <b>0</b>      | <b>5</b>  | <b>0</b>  | <b>1</b> |
| 113     | 149     | IPI00230612             | Phosphoribosylglycinamide formyltransferase                               | 108       | 0             | 0        | 0        | 10        | 2         | 7        | 4             | 6         | 4         | 4        |
| 128     | 76      | IPI00420363             | Probable ATP-dependent RNA helicase DDX5                                  | 69        | 0             | 0        | 0        | 19        | 7         | 12       | 3             | 10        | 10        | 5        |
| 157     |         | IPI00317902             | Proteasome (prosome, macropain) subunit, beta type 5                      | 29        | 0             | 0        | 1        | 18        | 3         | 12       |               |           |           |          |
| 371     | 448     | <b>IPI00131315 (+1)</b> | <b>Unc-119 homolog A</b>                                                  | <b>27</b> | <b>0</b>      | <b>0</b> | <b>0</b> | <b>9</b>  | <b>0</b>  | <b>0</b> | <b>0</b>      | <b>5</b>  | <b>0</b>  | <b>0</b> |
| 363     | 471     | IPI00380195             | RIKEN cDNA 1700012G19 gene                                                | 35        | 0             | 0        | 0        | 3         | 2         | 2        | 0             | 4         | 4         | 1        |
| 136     | 176     | IPI00123557             | RuvB-like 2                                                               | 51        | 1             | 1        | 1        | 18        | 8         | 12       | 8             | 5         | 7         | 4        |
| 219     | 376     | IPI00454016             | S-adenosylmethionine synthetase isoform type-2                            | 44        | 1             | 0        | 0        | 10        | 2         | 9        | 1             | 4         | 5         | 2        |
| 495     | 644     | <b>IPI00114818</b>      | <b>SEC14-like protein 2</b>                                               | <b>46</b> | <b>0</b>      | <b>0</b> | <b>0</b> | <b>4</b>  | <b>0</b>  | <b>0</b> | <b>0</b>      | <b>3</b>  | <b>0</b>  | <b>0</b> |
| 166     | 182     | IPI00310091             | Serine/threonine-protein phosphatase 2A 65 kDa regulatory subunit A alpha | 65        | 1             | 0        | 0        | 12        | 3         | 12       | 4             | 5         | 5         | 6        |
| 187     | 333     | <b>IPI00622364 (+1)</b> | <b>Sorting nexin-1</b>                                                    | <b>59</b> | <b>0</b>      | <b>0</b> | <b>0</b> | <b>18</b> | <b>2</b>  | <b>8</b> | <b>1</b>      | <b>8</b>  | <b>4</b>  | <b>3</b> |
| 146     | 339     | <b>IPI00109212</b>      | <b>Sorting nexin-2</b>                                                    | <b>58</b> | <b>0</b>      | <b>0</b> | <b>0</b> | <b>16</b> | <b>0</b>  | <b>4</b> | <b>0</b>      | <b>10</b> | <b>2</b>  | <b>0</b> |
| 80      | 181     | IPI00112053             | Sorting nexin-5                                                           | 47        | 0             | 0        | 1        | 31        | 4         | 23       | 1             | 6         | 4         | 5        |
| 279     | 431     | IPI00409462             | Spliceosome RNA helicase Bat1                                             | 49        | 1             | 0        | 0        | 10        | 2         | 8        | 1             | 1         | 3         | 1        |
| 239     | 86      | IPI00126072             | Synaptic vesicle membrane protein VAT-1 homolog                           | 43        | 0             | 0        | 0        | 13        | 1         | 8        | 4             | 7         | 6         | 6        |
| 126     | 66      | IPI00116283             | T-complex protein 1 subunit gamma                                         | 61        | 0             | 0        | 0        | 22        | 2         | 12       | 7             | 11        | 9         | 9        |
| 91      | 132     | IPI00468688             | Threonyl-tRNA synthetase, cytoplasmic                                     | 83        | 1             | 0        | 0        | 14        | 5         | 18       | 4             | 3         | 9         | 4        |
| 402     | 409     | <b>IPI00421223</b>      | <b>Tropomyosin alpha-4 chain</b>                                          | <b>28</b> | <b>0</b>      | <b>0</b> | <b>0</b> | <b>5</b>  | <b>0</b>  | <b>2</b> | <b>0</b>      | <b>6</b>  | <b>1</b>  | <b>1</b> |
| 390     | 363     | <b>IPI00225371</b>      | <b>Unc-119 homolog B</b>                                                  | <b>28</b> | <b>0</b>      | <b>0</b> | <b>0</b> | <b>10</b> | <b>0</b>  | <b>1</b> | <b>0</b>      | <b>6</b>  | <b>0</b>  | <b>1</b> |
| 351     | 398     | <b>IPI00348414</b>      | <b>Ado, 2-aminoethanethiol dioxygenase</b>                                | <b>28</b> | <b>0</b>      | <b>0</b> | <b>0</b> | <b>10</b> | <b>1</b>  | <b>0</b> | <b>0</b>      | <b>6</b>  | <b>0</b>  | <b>0</b> |
| 161     | 253     | IPI00121552             | Uridine 5'-monophosphate synthase                                         | 52        | 0             | 0        | 0        | 10        | 1         | 7        | 2             | 5         | 3         | 6        |
| 253     | 453     | IPI00111181             | Vacuolar protein sorting-associated protein 35                            | 92        | 0             | 0        | 0        | 9         | 1         | 8        | 0             | 3         | 2         | 1        |
| 127     | 117     | IPI00405227             | Vinculin                                                                  | 117       | 1             | 0        | 0        | 16        | 6         | 23       | 7             | 11        | 11        | 6        |
